# Supplementary material for: Size-tunable and stable cesium lead-bromide perovskite nanocubes with near-unity photoluminescence quantum yield
Source: Royal Society of Chemistry journal article supplement (doi:10.1039/d1na00142f), 2021-01-01
Supplement: d1na00142f1.pdf [file d1na00142f1.pdf]

# Size-tunable and stable cesium lead-bromide perovskite nanocubes with near-unity photoluminescence quantum yield

Roberto Grisorio,<sup>\*,a</sup> Daniele Conelli,<sup>a</sup> Elisabetta Fanizza,<sup>b,c</sup> Marinella Striccoli,<sup>c</sup> Davide Altamura,<sup>d</sup> Cinzia Giannini,<sup>d</sup> Ignazio Allegretta,<sup>e</sup> Roberto Terzano,<sup>e</sup> Mihai Irimia-Vladu,<sup>f</sup> Nicola Margiotta<sup>b</sup> and Gian Paolo Suranna<sup>a,g</sup>

<sup>a</sup>Dipartimento di Ingegneria Civile, Ambientale, del Territorio, Edile e di Chimica (DICATECh), Politecnico di Bari, Via Orabona 4, 70125 Bari, Italy. E-mail: roberto.grisorio@poliba.it

<sup>b</sup>Dipartimento di Chimica, Università degli Studi di Bari "A. Moro", Via Orabona 4, 70126 Bari, Italy.

<sup>c</sup>CNR–Istituto per i Processi Chimico Fisici, UOS Bari, Via Orabona 4, 70126 Bari, Italy.

<sup>d</sup>CNR–Istituto di Cristallografia, via Amendola 122/O, Bari 70126, Italy.

<sup>e</sup>Dipartimento di Scienze del Suolo, della Pianta e degli Alimenti, Università degli Studi di Bari "Aldo Moro", Via G. Amendola 165/A, 70126 Bari, Italy.

<sup>f</sup>Institute of Physical Chemistry and Linz Institute of Organic Solar Cells, Johannes Kepler University Linz, Altenberger Straße 69, 4040 Linz, Austria.

<sup>g</sup>CNR NANOTEC – Istituto di Nanotecnologia, Via Monteroni, 73100 Lecce, Italy.

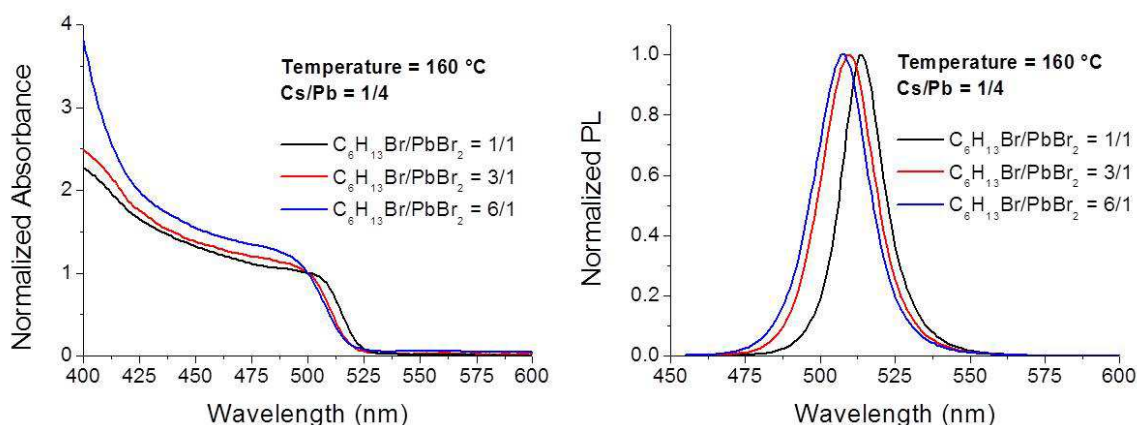

**Figure 1S.** (left) Normalized ( $\lambda = 500$  nm) absorption spectra (cyclohexane) of the  $CsPbBr_3$  NCs synthesized at 160 °C and a fixed Cs/Pb molar ratio (1/4) with different  $C_6H_{13}Br/PbBr_2$  molar ratios. (right) Normalized PL spectra (cyclohexane) of the same NCs.

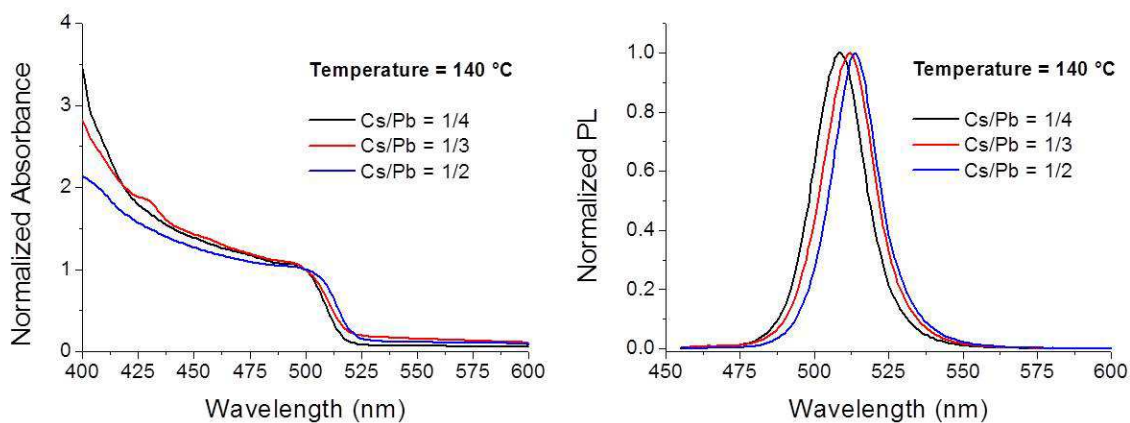

**Figure 2S.** (left) Normalized ( $\lambda = 500$  nm) absorption spectra (cyclohexane) of the  $CsPbBr_3$  NCs synthesized at 140 °C with different Cs/Pb molar ratios and (right) the corresponding photoluminescence profiles recorded in cyclohexane.

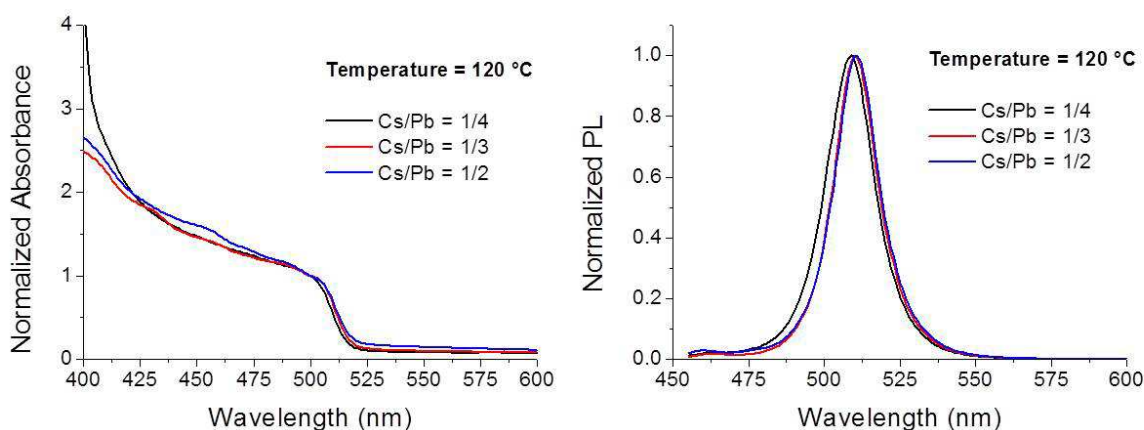

**Figure 3S.** (left) Normalized ( $\lambda = 500$  nm) absorption spectra (hexane) of the  $CsPbBr_3$  NCs synthesized at 120 °C with different Cs/Pb molar ratios and (right) the corresponding photoluminescence profiles recorded in cyclohexane.

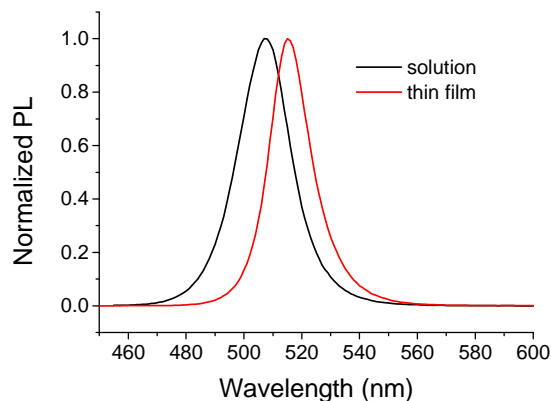

**Figure 4S.** Normalized PL spectra of the CsPbBr<sub>3</sub> NCs synthesized at 160 °C with Cs/Pb molar ratio of 1/4 in cyclohexane and in the solid state.

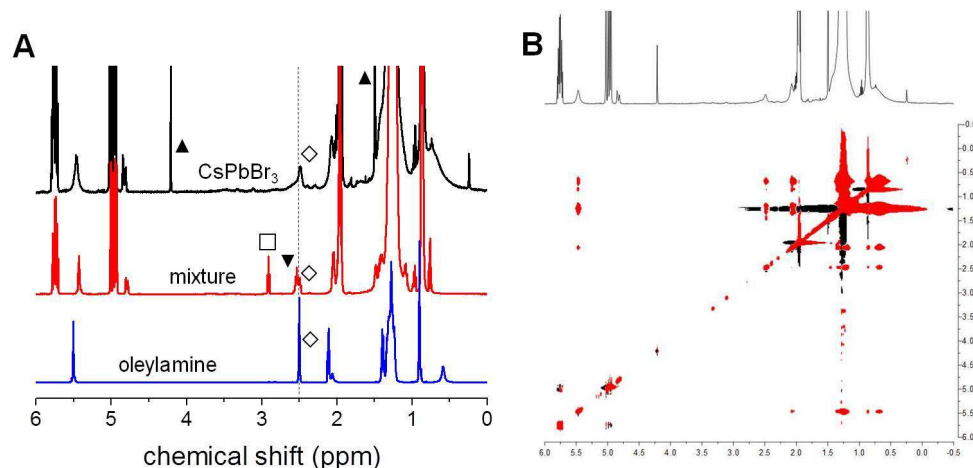

**Figure 5S.** (A) Comparison between the <sup>1</sup>H-NMR spectra (benzene-d<sub>6</sub>) of CsPbBr<sub>3</sub> NCs, the reaction mixture constituted by PbBr<sub>2</sub>, oleylamine and 1-bromohexane in ODE kept at 160 °C for 30 min and pure oleylamine. The plot highlights the characteristic resonances of the secondary amine (–CH<sub>2</sub>NH–, ▼), of oleylamine (–CH<sub>2</sub>NH<sub>2</sub>, ◇) and of residual 1-bromohexane (–CH<sub>2</sub>Br, □). The resonances ▲ are associated to methyl acetate used for the purification of the NCs. (B) NOESY spectrum of the aforementioned CsPbBr<sub>3</sub> NCs in benzene-d<sub>6</sub>.

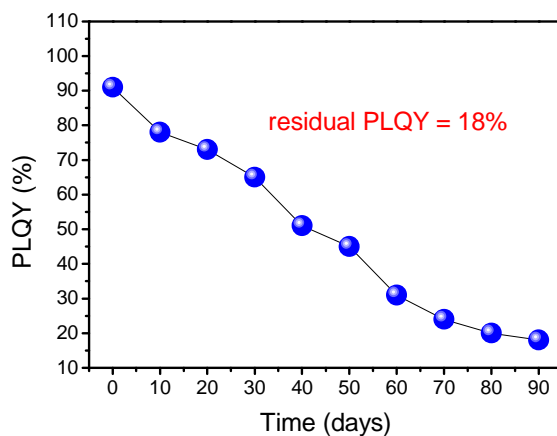

**Figure 6S.** PLQY trend as a function of time (days) for the cyclohexane solution of the NC synthesized in the presence of oleic acid.

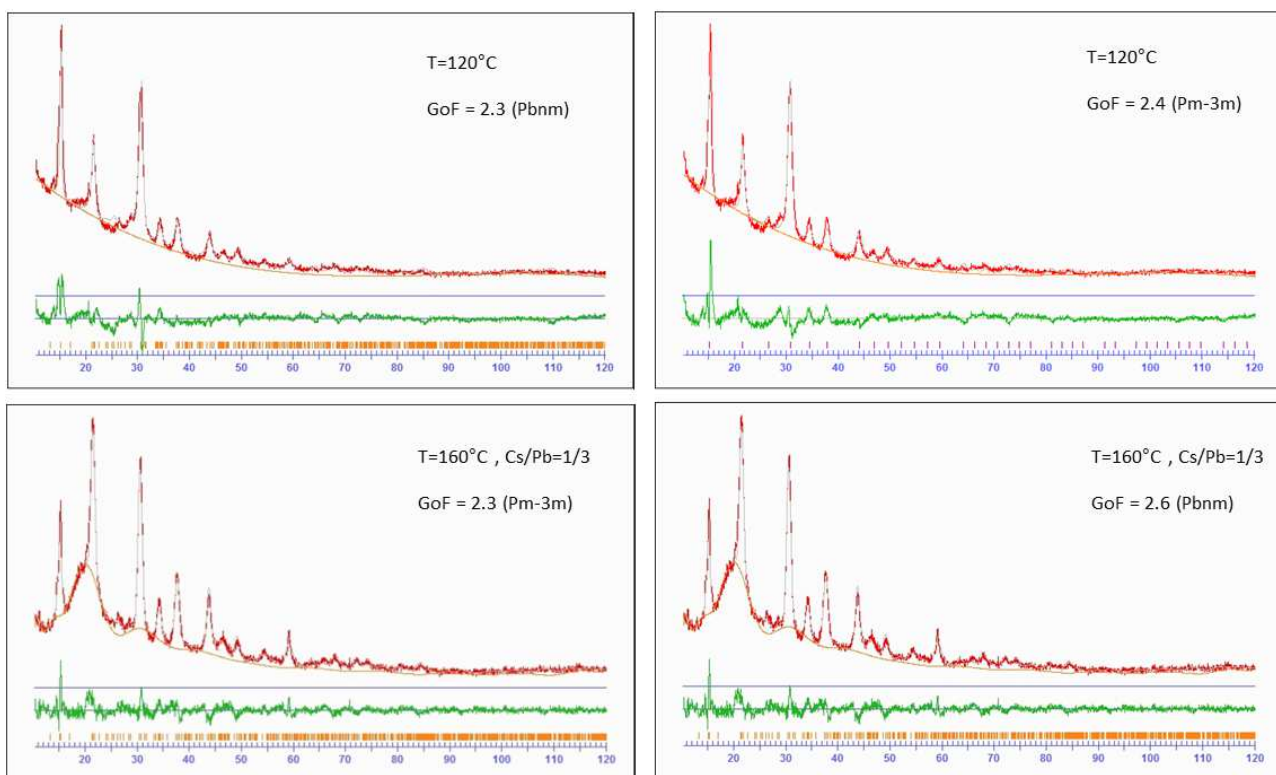

**Figure 7S.** XRD experimental (detector scan,  $5^\circ$  incidence, red curves) and relevant fit profiles (orange curves) are reported for samples prepared at  $T=120^\circ\text{C}$  and  $T = 160^\circ\text{C}$  with  $\text{Cs/Pb} = 1/3$ . Fitting was based on the orthorhombic (*Pbnm* space group) or cubic (*Pm-3m*)  $\text{CsPbBr}_3$  structure model (ICSD-97851 and COD-1533063, respectively). The difference profile (green curve) and the expected peak positions (bars) are reported at the bottom of each panel. Fits featuring the lower GoF value are reported on the left column.

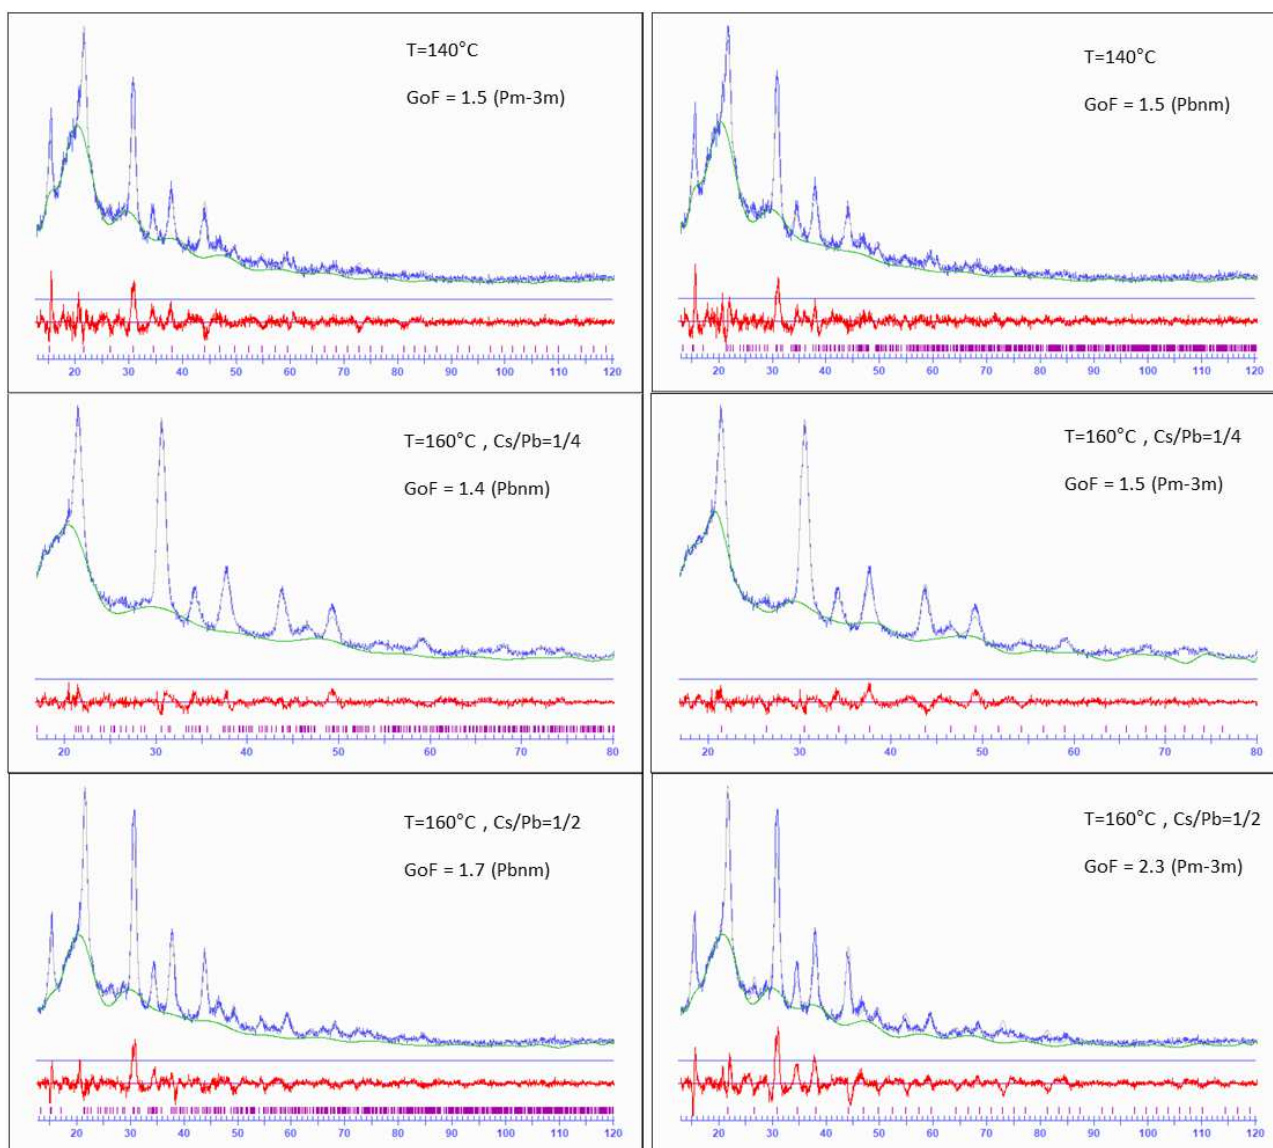

**Figure 8S.** XRD experimental (detector scan,  $5^\circ$  incidence, blue curves) and relevant fit profiles (grey lines) are reported for samples prepared at  $T=140^\circ\text{C}$  and  $T=160^\circ\text{C}$  with  $\text{Cs/Pb} = 1/4$  and  $\text{Cs/Pb} = 1/2$ . Fitting was based on the orthorhombic (Pbnm) or cubic (Pm-3m)  $\text{CsPbBr}_3$  structure model (ICSD-97851, COD-1533063, respectively). The difference profile (red curve) and the expected peak positions (bars) are reported at the bottom of each panel. Fits featuring the lower GoF value are reported on the left column.
